# Supplementary material
Source: publisher site journal article supplement (https://www.dovepress.com/article/371766)

| Supplementary Table 1. Univariate and multivariate analyses of the relative risk of leukemia transformation after propensity score matching | | | | | |
| --- | --- | --- | --- | --- | --- |
| **Variables** | **Univariate Analysis** | |  | **Multivariate Analysis** | |
| **HR (95%CI)** | **p** |  | **HR (95%CI)** | **p** |
| **Treatment** (supportive vs. chemotherapy*) | 4.448 (0.540-36.612) | 0.165 |  | 4.59 (0.506-41.590) | 0.175 |
| **Age (year)** (＜60 vs. ≥60) | 0.525 (0.125-2.206) | 0.379 |  | 0.438 (0.068-2.221) | 0.319 |
| **Gender** (female vs. male) | 1.022 (0.205-5.089) | 0.979 |  |  |  |
| **WBC (×109/L)** (＜13 vs. ≥13) | 2.723 (0.541-13.718) | 0.225 |  | 4.111 (0.433-39.025) | 0.218 |
| **Hb (g/L)** (＜60 vs. ≥60) | 1.373 (0.167-11.276) | 0.768 |  |  |  |
| **Albumin (g/L)** (＜30 vs. ≥30) | 0.646 (0.129-3.232) | 0.595 |  | 2.068 (0.279-15.315) | 0.477 |
| **Blast cell in PB (%)** (＜5 vs. ≥5) | 1.992 (0.396-10.021) | 0.403 |  |  |  |
| **Blast cell in BM (%)** (＜10 vs. ≥10) | 0.455 (0.090-2.296) | 0.340 |  |  |  |
| **Bone marrow dysplasia in smear** (absent vs. Single/multi-lineage) | 3.122 (0.664-14.689) | 0.150 |  | 3.727 (0.662-20.974) | 0.136 |
| **Megakaryocyte dysplasia**  (no vs. yes) | 2.513 (0.619-10.206) | 0.198 |  |  |  |
| **WHO** (CMML-0 & CMML-1 vs. CMML-2) | 0.661 (0.156-2.796) | 0.573 |  |  |  |
| **Chromosome karyotype** (normal vs. abnormal) | 0.866 (0.104-7.198) | 0.894 |  |  |  |
| **CPSS** (low & intermediate-1 vs. intermediate-2 & high) | 0.831 (0.102-6.806) | 0.863 |  | 1.475 (0.085-25.650) | 0.790 |
| WBC, white blood cell; Hb, hemoglobin; PLT, platelet count; CPSS, CMML-specific Prognostic Scoring System; PB, Peripheral blood; BM, bone marrow;  *Chemotherapy group included patients underwent Hematopoietic Stem Cell Transplantation (HSCT) | | | | | |

S Figure 1. Flowchart of the study


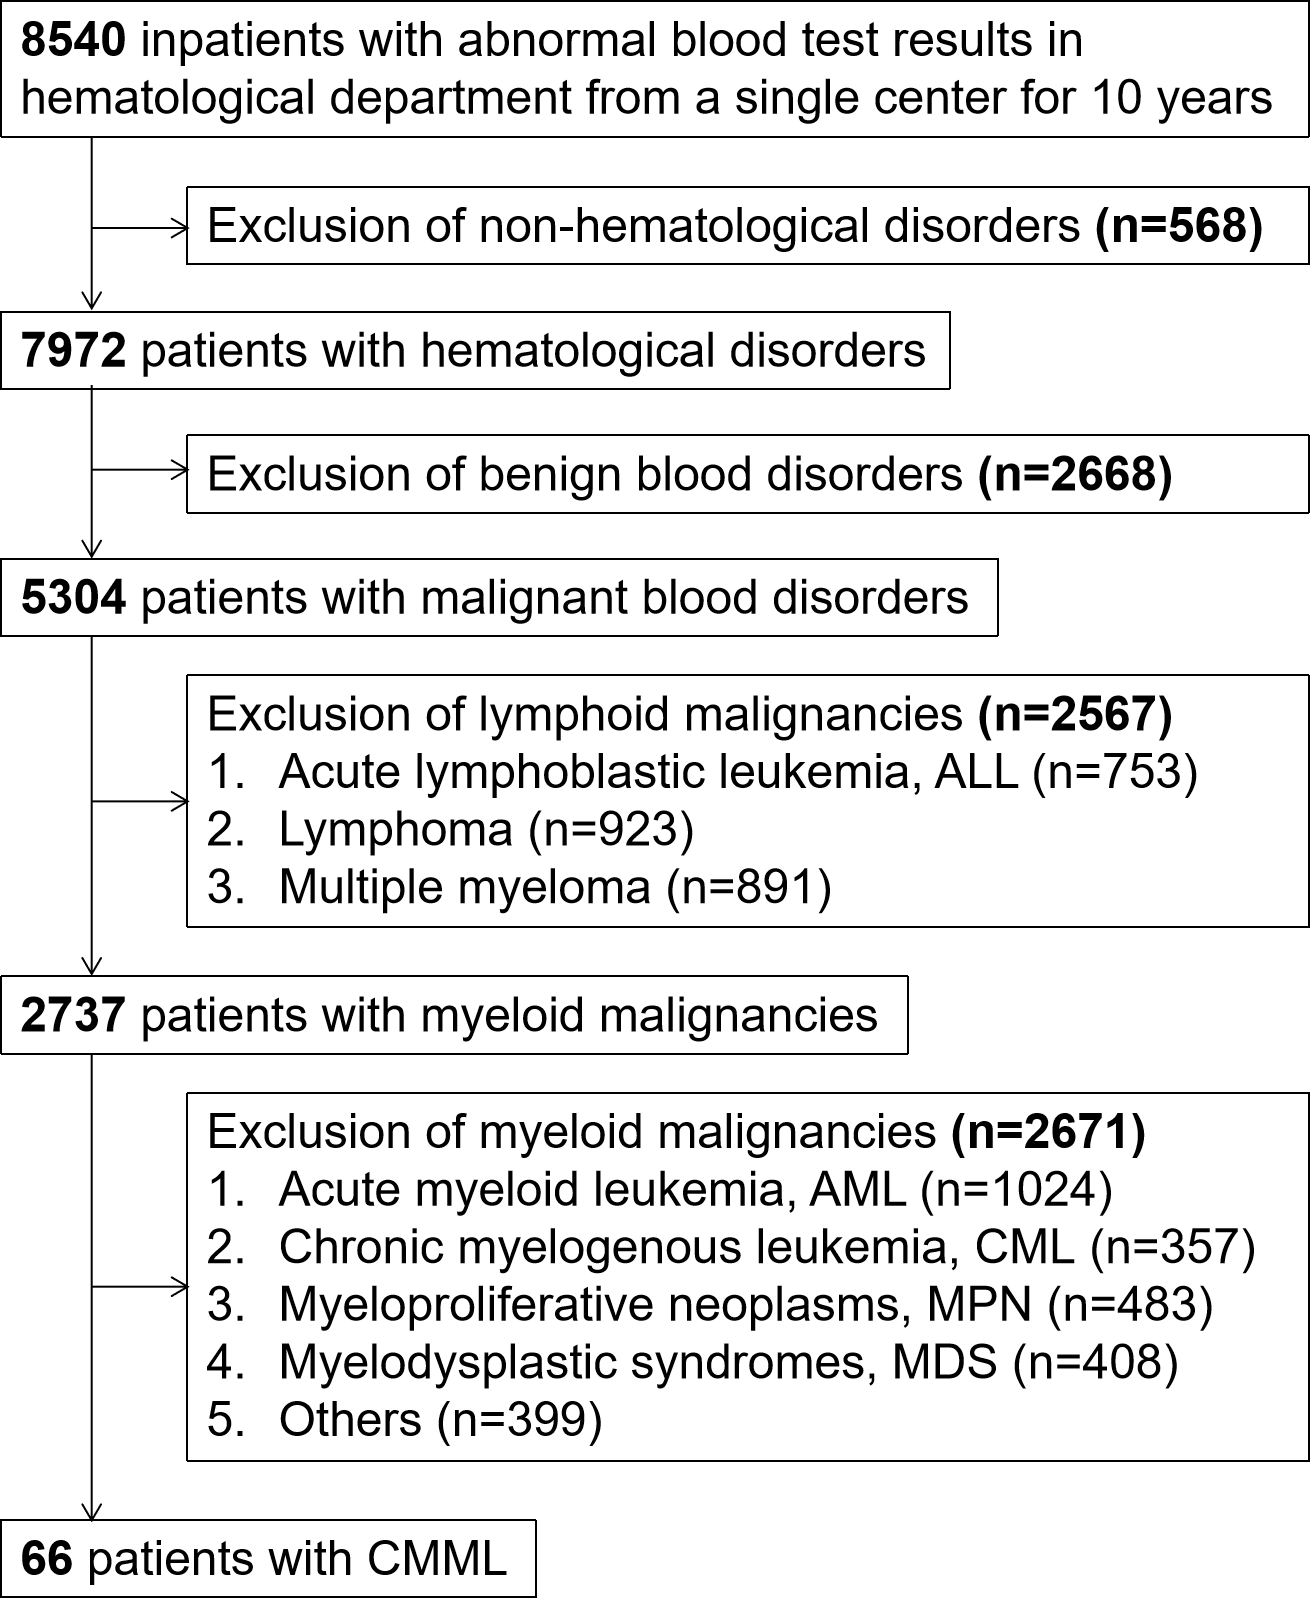

Supplement: Supplementary file 1 [file get_supplementary_file.php]
